# Supplementary material for: Vertical characteristics of aerosol hygroscopicity and impacts on optical properties over the North China Plain during winter
Source: Copernicus journal article supplement (doi:10.5194/acp-2019-1020), 2019-12-09
Supplement: Supplementary file 1 [file acp-2019-1020-supplement.pdf]

*Supplement of*

**Vertical characteristics of aerosol hygroscopicity and impacts on optical properties over the North China Plain during winter**

Quan Liu, Dantong Liu, Qian Gao, Ping Tian, Fei Wang, Delong Zhao, Kai Bi, Yangzhou Wu, Shuo Ding, Kang Hu, Jiale Zhang, Deping Ding, Chunsheng Zhao

Corresponding author: Dantong Liu ([dantongliu@zju.edu.cn](mailto:dantongliu@zju.edu.cn))

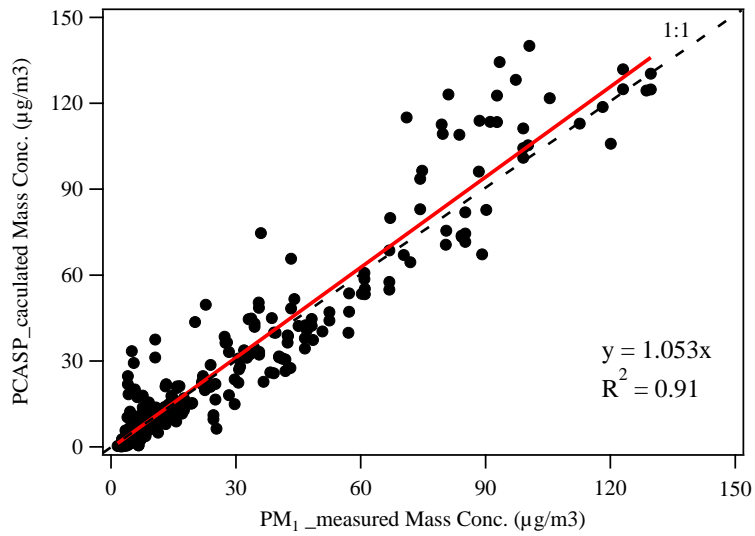

Figure S1. Comparison between PM<sub>1</sub> derived from the PCASP size distribution and measurements in the cabin for all flights.

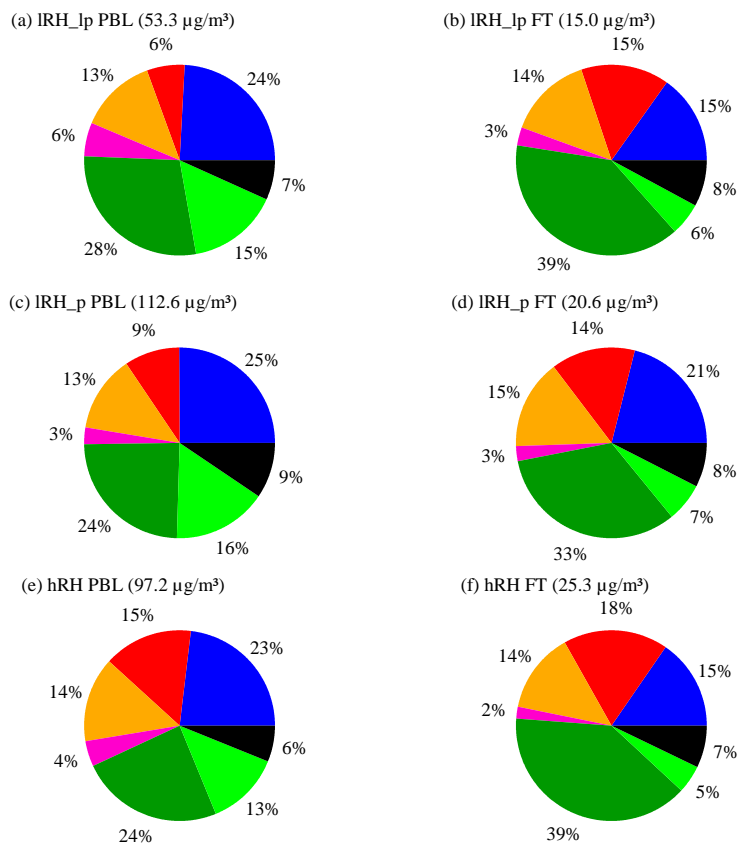

Figure S2. The aerosol chemical compositions in the PBL and FT under all conditions: (a-b) in the PBL and FT under IRH and less polluted conditions (IRH\_lp), (c-d) in the PBL and FT under IRH and polluted conditions (IRH\_p), and (e-f) in the PBL and FT under hRH conditions.

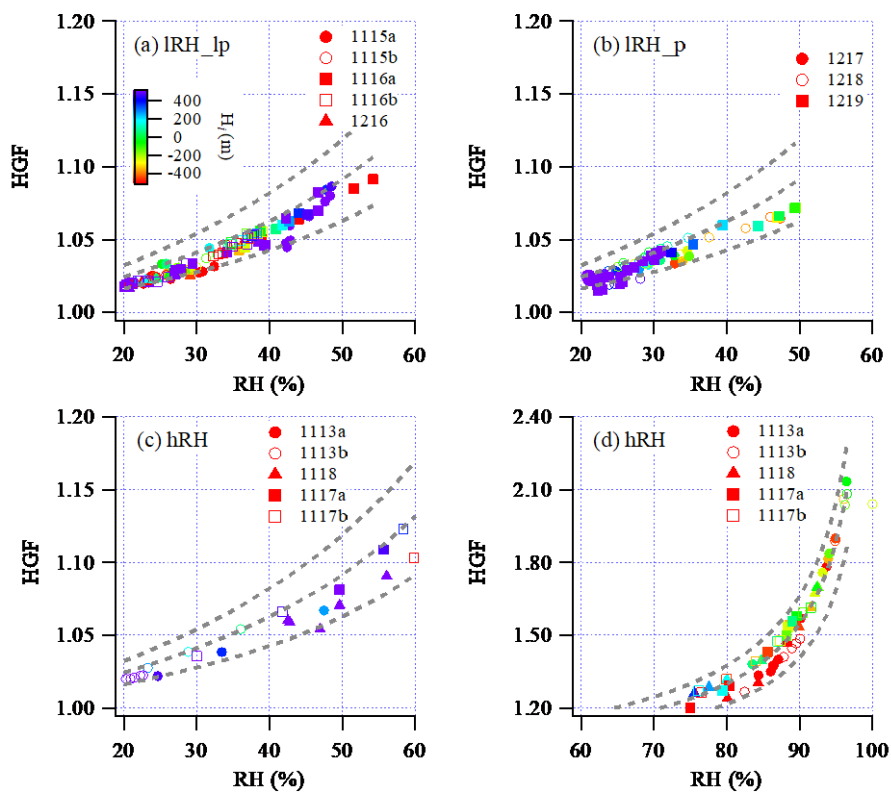

Figure S3. Correlations between hygroscopic growth factor (HGF) and RH, (a) under IRH\_lp condition, (b) under IRH\_p condition, (c) under hRH condition, RH < 60%, and (d) under hRH condition, RH > 60%. The reference grey dash lines denote the calculated HGFs by assuming constant  $\kappa$  of 0.2, 0.3, 0.4, respectively.

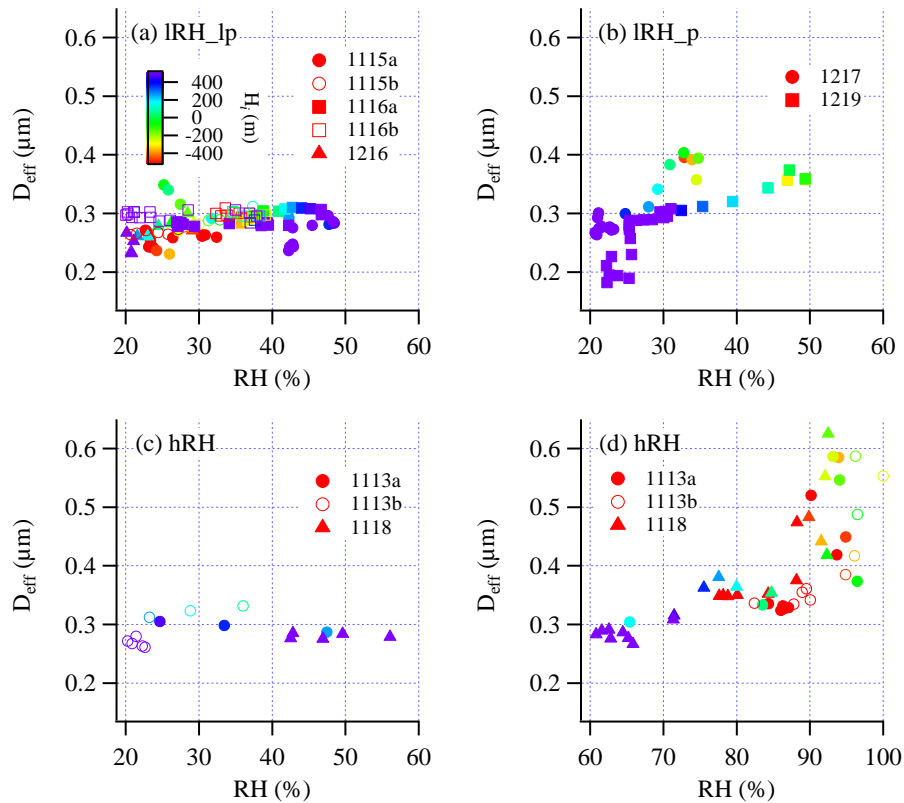

Figure S4. Correlations between  $D_{\text{eff}}$  and RH for all flights, (a) under IRH\_lp condition, (b) under IRH\_p condition, (c) under hRH condition,  $\text{RH} < 60\%$ , and (d) under hRH condition,  $\text{RH} > 60\%$ .

20161113 9:40-12:00 (LT)

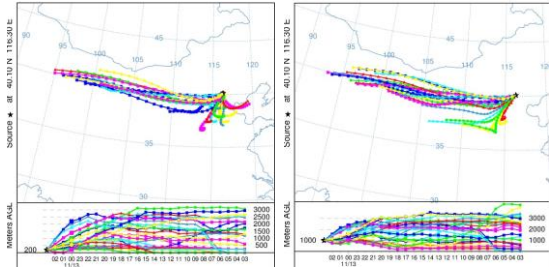

20161113 16:30-18:25 (LT)

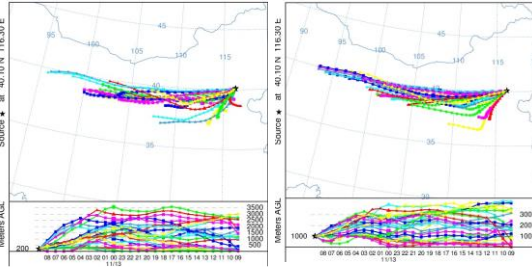

20161115 10:00-12:40 (LT)

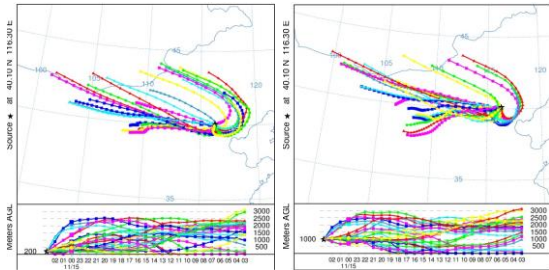

20161115 15:30-17:10 (LT)

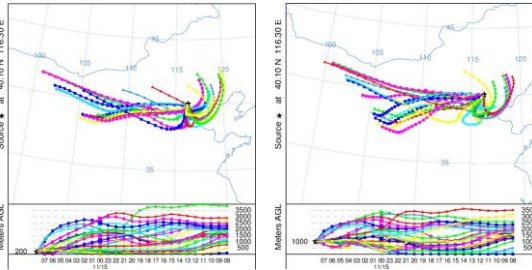

20161116 10:25-12:20 (LT)

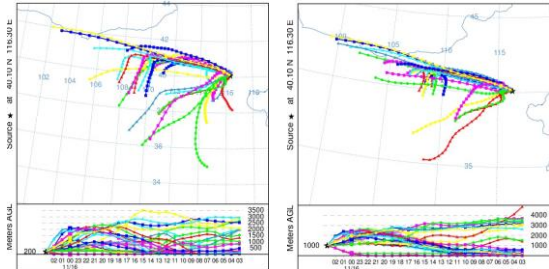

20161116 15:45-18:25 (LT)

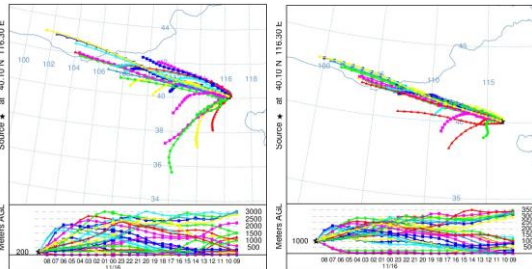

20161117 09:25-10:45 (LT)

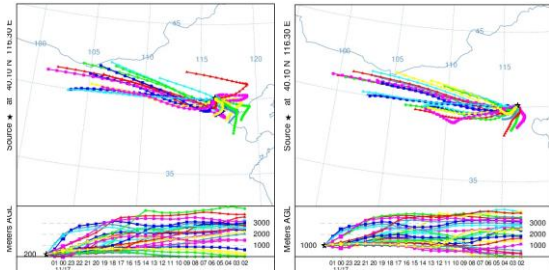

20161117 15:35-17:10 (LT)

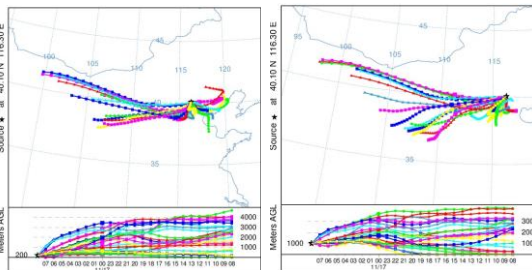

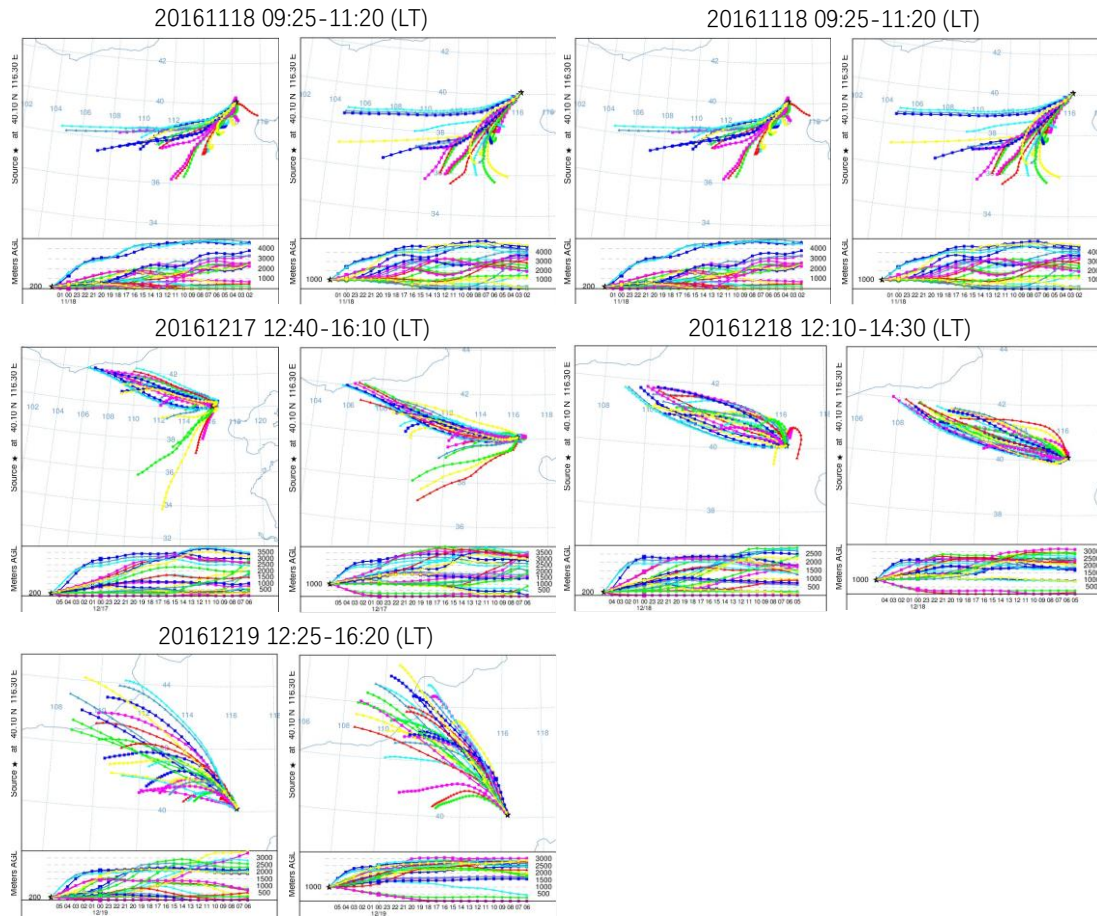

Figure S5. HYSPLIT ensemble backward trajectories during the experiment. The endpoint heights of back trajectories are set to 200 m a.s.l (left panels) and 1000 m a.s.l. (right panels). LT=local Time.
